# Supplementary material for: Cam morphology is associated with MRI-defined cartilage defects and labral tears: a case–control study of 237 young adult football players with and without hip and groin pain
Source: HighWire-hosted journal article supplement (doi:10.1136/bmjsem-2021-001199), 2021-12-01
Supplement: bmjsem-2021-001199supp001_data_supplement.pdf [file bmjsem-2021-001199supp001_data_supplement.pdf]

**Supplementary table 1.** Eligibility criteria for hip and/or groin pain and control group

| Table 1. Participant inclusion and exclusion criteria                                                                                                                                                                                    |                                                                                                                                                                                                                                                                                                                                                                                                                                                                                                                                                                                                                                                                                                                                                                                                                                                                                                                                         |                                                                                                                                                                                                                                                                                                                                                                                                                                                                                                                                                                                                                                                                                                       |
|------------------------------------------------------------------------------------------------------------------------------------------------------------------------------------------------------------------------------------------|-----------------------------------------------------------------------------------------------------------------------------------------------------------------------------------------------------------------------------------------------------------------------------------------------------------------------------------------------------------------------------------------------------------------------------------------------------------------------------------------------------------------------------------------------------------------------------------------------------------------------------------------------------------------------------------------------------------------------------------------------------------------------------------------------------------------------------------------------------------------------------------------------------------------------------------------|-------------------------------------------------------------------------------------------------------------------------------------------------------------------------------------------------------------------------------------------------------------------------------------------------------------------------------------------------------------------------------------------------------------------------------------------------------------------------------------------------------------------------------------------------------------------------------------------------------------------------------------------------------------------------------------------------------|
|                                                                                                                                                                                                                                          | Hip and/or groin pain group                                                                                                                                                                                                                                                                                                                                                                                                                                                                                                                                                                                                                                                                                                                                                                                                                                                                                                             | Control group                                                                                                                                                                                                                                                                                                                                                                                                                                                                                                                                                                                                                                                                                         |
| Inclusion criteria                                                                                                                                                                                                                       | <ul style="list-style-type: none"> <li>• Age: 18 to 50 years</li> <li>• Playing in a sub-elite football competition</li> <li>• Undertaking at least 2 sessions (games or training) of football (soccer/AF) per week</li> <li>• Self-reported hip (anterior/lateral/posterior) and/or groin pain which fulfilled criteria 1 to 3               <ol style="list-style-type: none"> <li>1. <i>Gradual onset</i></li> <li>2. <i>Greater than six months in duration</i></li> <li>3. <i>&gt;3 and &lt;8 on an 11-point NPRS* with football or football specific movements (squatting, kicking or cutting/change of direction)</i><br/>+ or - symptoms including clicking, giving way, locking or catching</li> </ol> </li> <li>• Positive FADIR test in at least one hip</li> </ul>                                                                                                                                                          | <ul style="list-style-type: none"> <li>• Age: 18 to 50 years</li> <li>• Playing in a sub-elite football competition</li> <li>• Undertaking at least 2 sessions (games or training) of football (soccer/AF) per week</li> <li>• Negative FADIR test in both hips</li> </ul>                                                                                                                                                                                                                                                                                                                                                                                                                            |
| Exclusion criteria                                                                                                                                                                                                                       | <ul style="list-style-type: none"> <li>• Self-reported history of significant hip or groin condition, specifically: <i>bursitis, congenital dislocation of the hip, fractures, osteochondritis dissecans, Legg-Calvé-Perthes disease, septic or rheumatoid arthritis, slipped capital femoral epiphysis or subluxations/dislocations</i></li> <li>• Previous hip, groin or pelvic surgery</li> <li>• KL grade 2 or greater on AP pelvis radiograph</li> <li>• Any lumbar spine or lower limb injury/complaint in the previous 3 months (i.e. hamstring muscle injury or sprained ankle) that resulted in the inability to weight-bear fully or undertake testing procedures</li> <li>• Contra-indications to radiographs (i.e., pregnancy) or MRI (i.e., claustrophobia)</li> <li>• Received intra-articular hip injection (of any type) in the previous 3 months</li> <li>• Unable to understand spoken and written English</li> </ul> | <ul style="list-style-type: none"> <li>• Self-reported history of hip and/or groin pain, or significant hip or groin condition (see symptomatic group exclusion criteria for details)</li> <li>• Past history of lower limb surgery (e.g., ACLR)</li> <li>• KL grade 2 or greater on AP pelvis radiograph</li> <li>• Any lumbar spine or lower limb injury/complaint in the previous 3 months (e.g. hamstring muscle injury or sprained ankle) that resulted in the inability to weight-bear fully or undertake testing procedures</li> <li>• Contra-indications to radiographs (i.e., pregnancy) or MRI (i.e., claustrophobia)</li> <li>• Unable to understand spoken and written English</li> </ul> |
| ACLR, anterior cruciate ligament reconstruction; AF, Australian Football; AP, anteroposterior; FADIR, flexion adduction internal rotation; KL, Kellgren and Lawrence; MRI, magnetic resonance imaging; NPRS, numerical pain rating scale |                                                                                                                                                                                                                                                                                                                                                                                                                                                                                                                                                                                                                                                                                                                                                                                                                                                                                                                                         |                                                                                                                                                                                                                                                                                                                                                                                                                                                                                                                                                                                                                                                                                                       |

One investigator (RA) analysed hips for the presence of radiographic hip OA with the KL classification, with hip OA defined as a KL grade of  $\geq 2$ . [14] Substantial intra-rater agreement was found for KL grading ( $\kappa = 0.87$ ) [7]  
Use of the numerical pain rating scale in symptomatic football players is a deviation from the original study protocol [13]

**Supplementary table 2.** Magnetic resonance imaging protocol

| MRI Sequence               | Coronal PD SPAIR  | Sagittal PD SPAIR | Oblique axial PD SPAIR |
|----------------------------|-------------------|-------------------|------------------------|
| Field of view (mm)         | 170 x 170         | 150 x 150         | 170 x 170              |
| Slice thickness (mm)       | 2.5               | 2.5               | 2.5                    |
| Slice gap (mm)             | 1.5               | 1                 | 1.5                    |
| Repetition time (ms)       | 2700              | 2675              | 3500                   |
| Echo time (ms)             | 25                | 25                | 25                     |
| Voxel size (mm)            | 0.70 x 0.70 x 2.5 | 0.7 x 0.75 x 2.5  | 0.75 x 0.75 x 2.5      |
| Acquisition time (min:sec) | 3:17              | 4:18              | 2:35                   |

Abbreviations: PD; proton density; SPAIR, spectral attenuated inversion recovery

## Supplementary figure 1. Participant flow chart hip and/or groin pain group

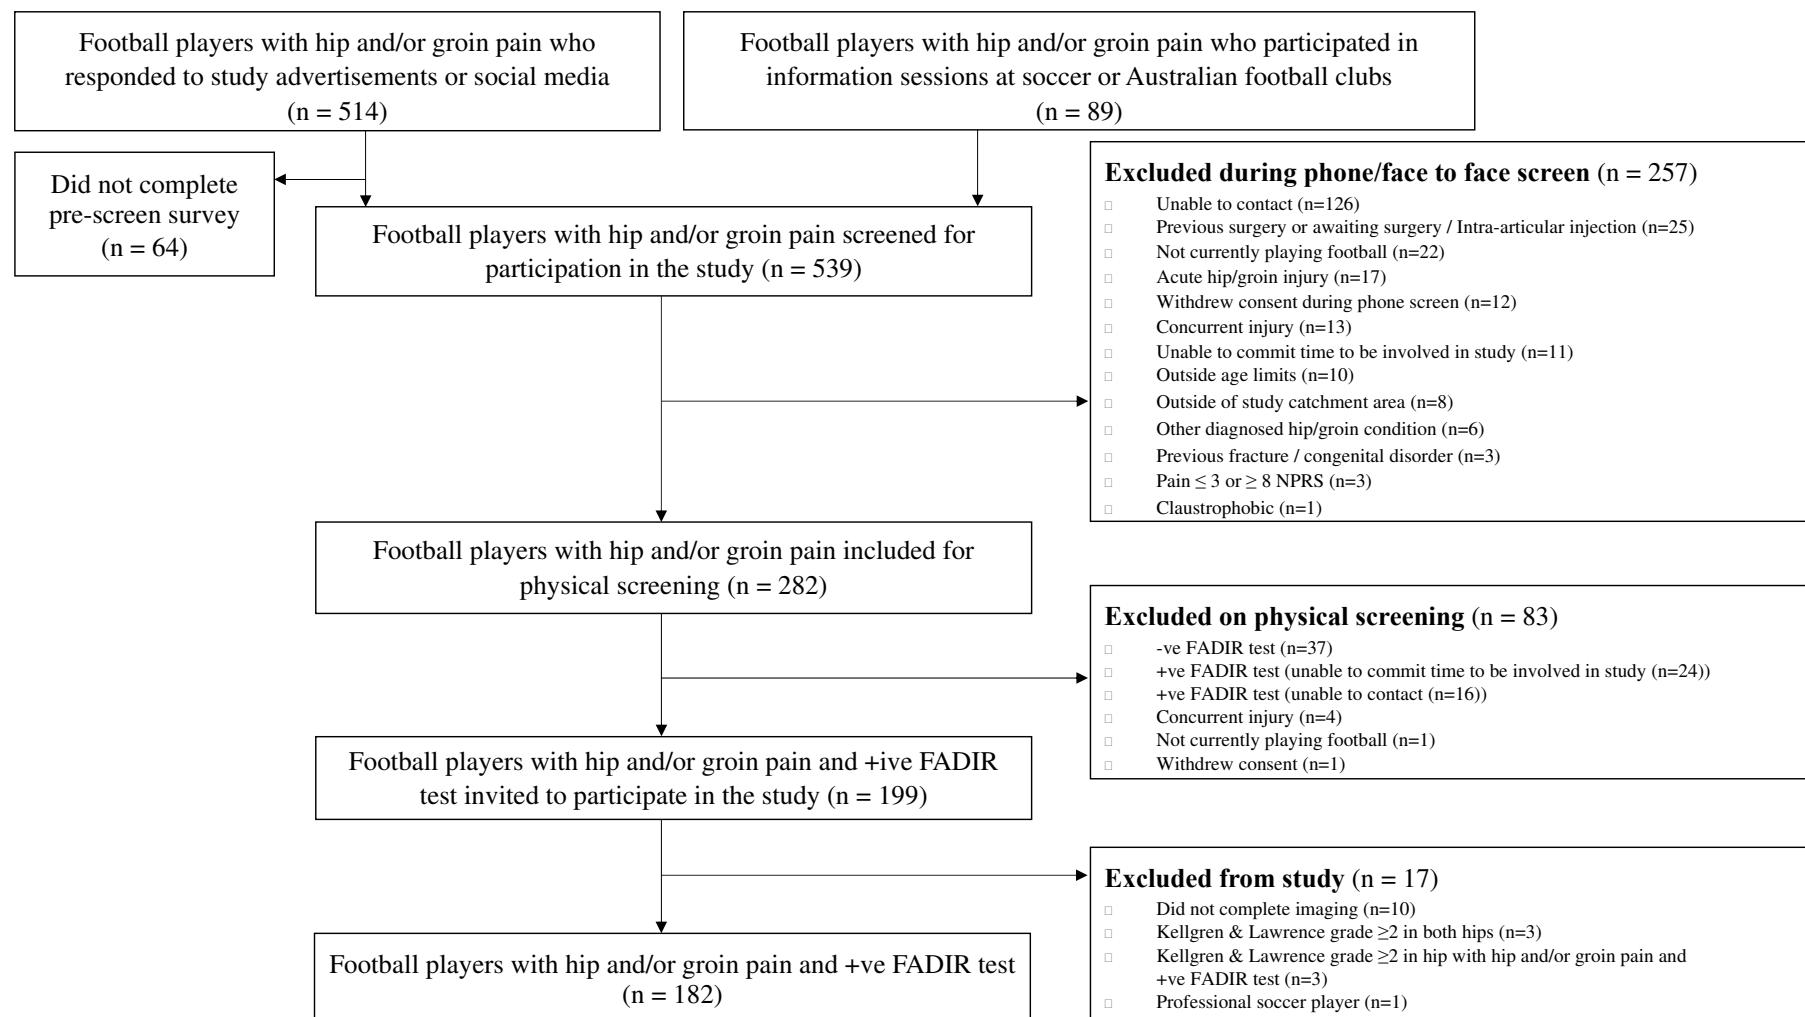

## Supplementary figure 2. Participant flow chart control group

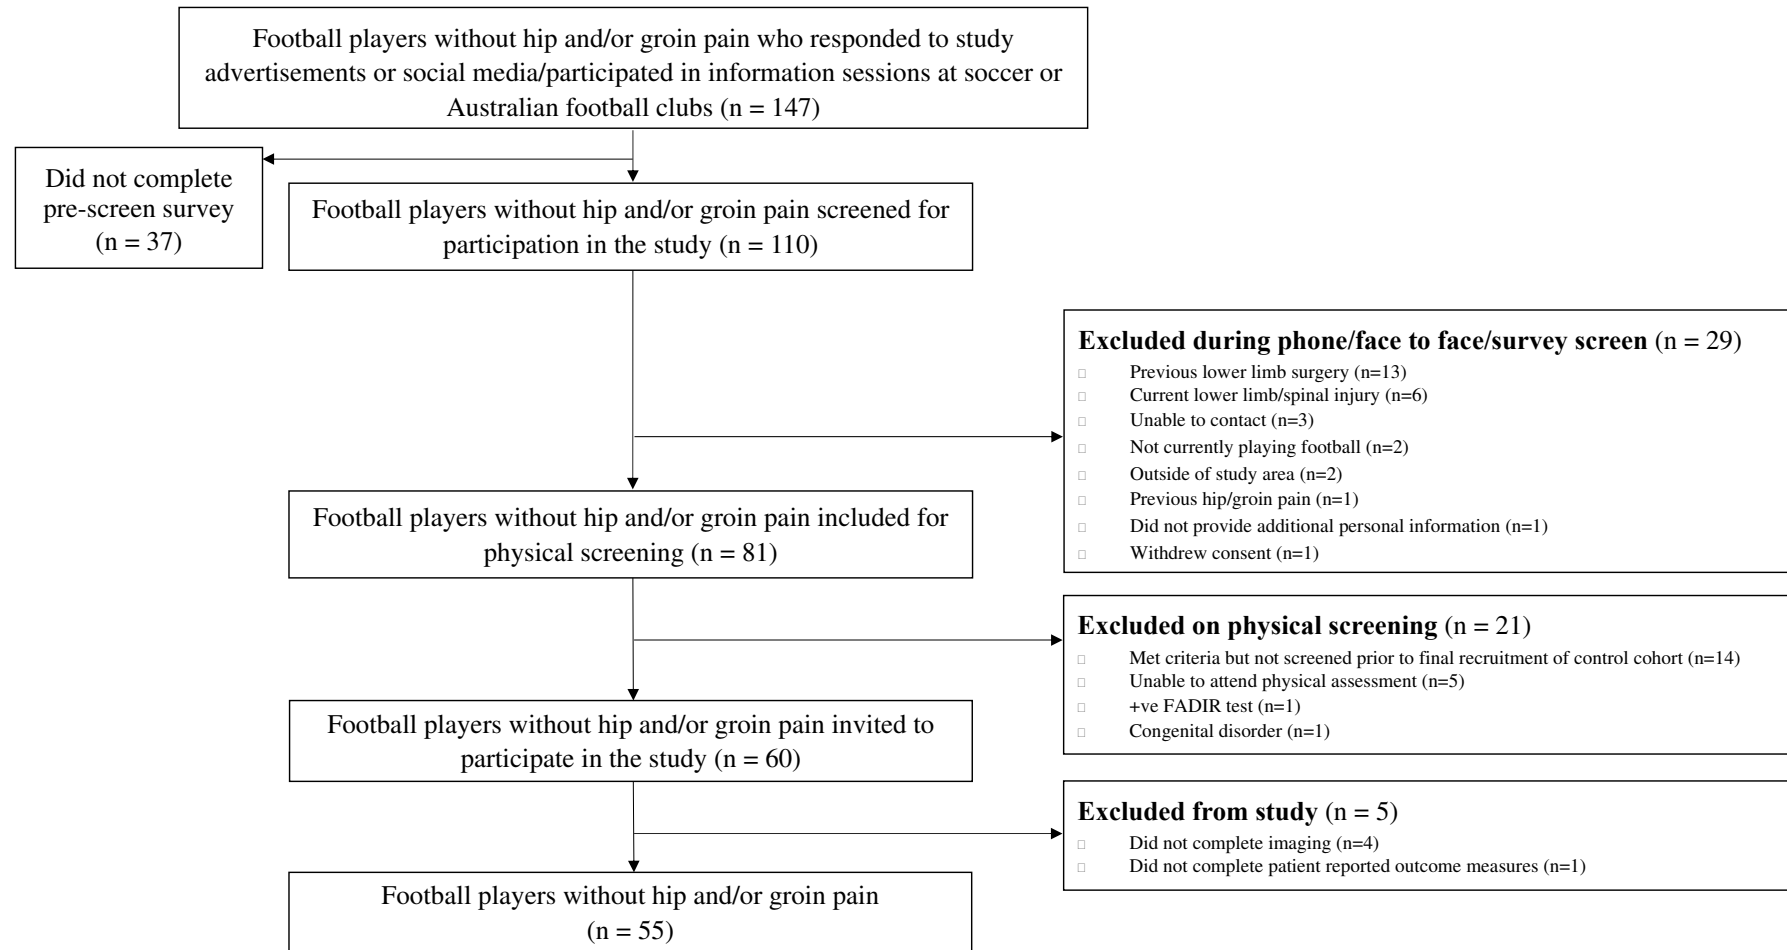

**Supplementary table 3.** Predicted probability from 0 (0%) to 1 (100%) of cartilage defects and labral tears (presence) for values of alpha angle in 5° increments for all hips (hip and/or groin pain and control)

| Alpha angle | Probability of cartilage defect<br>% (95%CI) |             | Probability of labral tear<br>% (95%CI) |             |
|-------------|----------------------------------------------|-------------|-----------------------------------------|-------------|
|             | AP                                           | Dunn 45°    | AP                                      | Dunn 45°    |
| 40°         | 38 (29, 46)                                  | 37 (25, 49) | 62 (54, 71)                             | 57 (44, 71) |
| 45°         | 41 (33, 48)                                  | 39 (29, 50) | 65 (58, 72)                             | 60 (49, 71) |
| 50°         | 44 (37, 51)                                  | 42 (32, 51) | 67 (61, 73)                             | 63 (54, 72) |
| 55°         | 47 (41, 53)                                  | 44 (36, 52) | 70 (64, 75)                             | 65 (58, 73) |
| 60°         | 50 (44, 56)                                  | 46 (39, 53) | 72 (66, 77)                             | 68 (62, 74) |
| 65°         | 53 (47, 60)                                  | 49 (42, 55) | 74 (68, 79)                             | 70 (65, 76) |
| 70°         | 57 (50, 64)                                  | 51 (45, 57) | 76 (70, 82)                             | 73 (67, 78) |
| 75°         | 60 (52, 68)                                  | 53 (46, 60) | 78 (71, 84)                             | 75 (69, 81) |
| 80°         | 63 (54, 71)                                  | 56 (48, 64) | 79 (72, 86)                             | 77 (70, 83) |
| 85°         | 66 (56, 75)                                  | 58 (49, 67) | 81 (74, 89)                             | 79 (72, 86) |
| 90°         | 69 (58, 79)                                  | 60 (50, 71) | 83 (75, 91)                             | 81 (73, 89) |
| 95°         | 71 (60, 82)                                  | 62 (51, 74) | 84 (76, 92)                             | 82 (74, 91) |
| 100°        | 74 (63, 85)                                  | 65 (51, 78) | 85 (77, 94)                             | 84 (75, 93) |
| 105°        | 76 (65, 88)                                  | 67 (52, 81) | 87 (78, 95)                             | 85 (76, 95) |
| 110°        | 79 (67, 91)                                  | 69 (53, 85) | 88 (79, 97)                             | 87 (77, 97) |

Adjusted for age, sex, body mass index, KL grade and symptoms  
AP, anteroposterior

**Supplementary table 4.** Association between alpha angle and cartilage defects (location) for all hips (hip and/or groin pain and control)

| Radiographic variable       | Cartilage defect                         |                                         |
|-----------------------------|------------------------------------------|-----------------------------------------|
|                             | Unadjusted OR (95%CI)<br><i>P</i> -value | Adjusted OR (95%CI)*<br><i>P</i> -value |
|                             | <b>Superolateral subregion</b>           |                                         |
| Alpha angle (AP view)       | 1.04 (1.02, 1.05)<br><0.001              | 1.03 (1.02, 1.05)<br><0.001             |
| Alpha angle (Dunn 45° view) | 1.04 (1.03, 1.06)<br><0.001              | 1.04 (1.02, 1.05)<br><0.001             |
|                             | <b>Superomedial subregion</b>            |                                         |
| Alpha angle (AP view)       | 1.00 (0.98, 1.02)<br>0.936               | 1.00 (0.98, 1.02)<br>0.975              |
| Alpha angle (Dunn 45° view) | 0.99 (0.96, 1.01)<br>0.381               | 0.99 (0.96, 1.01)<br>0.302              |
|                             | <b>Lateral subregion</b>                 |                                         |
| Alpha angle (AP view)       | 1.01 (0.99, 1.02)<br>0.299               | 1.01 (0.99, 1.02)<br>0.303              |
| Alpha angle (Dunn 45° view) | 1.00 (0.98, 1.01)<br>0.767               | 1.00 (0.98, 1.01)<br>0.700              |

\*Adjusted for age, sex, body mass index, KL grade and symptoms  
AP, anteroposterior; OR, odds ratio

**Supplementary table 5.** Association between alpha angle and labral tears (location) for all hips (hip and/or groin pain and control)

| Radiographic variable       | Labral tear                              |                                         |
|-----------------------------|------------------------------------------|-----------------------------------------|
|                             | Unadjusted OR (95%CI)<br><i>P</i> -value | Adjusted OR (95%CI)*<br><i>P</i> -value |
|                             | Superior subregion                       |                                         |
| Alpha angle (AP view)       | 1.03 (1.02, 1.05)<br><0.001              | 1.03 (1.02, 1.05)<br><0.001             |
| Alpha angle (Dunn 45° view) | 1.03 (1.02, 1.05)<br><0.001              | 1.03 (1.01, 1.04)<br>0.003              |
|                             | Anterosuperior subregion                 |                                         |
| Alpha angle (AP view)       | 1.00 (0.99, 1.02)<br>0.499               | 1.01 (0.99, 1.02)<br>0.342              |
| Alpha angle (Dunn 45° view) | 1.01 (0.99, 1.02)<br>0.280               | 1.01 (1.00, 1.03)<br>0.128              |

\*Adjusted for age, sex, body mass index, KL grade and symptoms  
AP, anteroposterior; OR, odds ratio



**Supplementary table 6.** Predicted probability from 0 (0%) to 1 (100%) of cartilage defects and labral tears (location) for values of alpha angle in 5° increments for all hips (hip and/or groin pain and control)

| Alpha angle | Probability of superolateral cartilage defect<br>% (95%CI) |             | Probability of superior labral tear<br>% (95%CI) |             |
|-------------|------------------------------------------------------------|-------------|--------------------------------------------------|-------------|
|             | AP                                                         | Dunn 45°    | AP                                               | Dunn 45°    |
| 40°         | 25 (18, 32)                                                | 19 (10, 27) | 24 (17, 31)                                      | 23 (13, 32) |
| 45°         | 28 (21, 35)                                                | 22 (13, 30) | 27 (21, 33)                                      | 25 (16, 34) |
| 50°         | 31 (25, 38)                                                | 25 (17, 33) | 30 (24, 36)                                      | 28 (20, 35) |
| 55°         | 35 (29, 41)                                                | 28 (21, 35) | 34 (28, 39)                                      | 30 (23, 37) |
| 60°         | 39 (33, 45)                                                | 32 (26, 38) | 37 (32, 43)                                      | 33 (27, 39) |
| 65°         | 43 (37, 49)                                                | 36 (30, 42) | 41 (35, 47)                                      | 36 (30, 42) |
| 70°         | 47 (40, 54)                                                | 40 (34, 46) | 45 (38, 51)                                      | 39 (33, 45) |
| 75°         | 51 (43, 59)                                                | 44 (38, 51) | 49 (41, 56)                                      | 42 (36, 49) |
| 80°         | 55 (46, 64)                                                | 49 (41, 57) | 52 (44, 61)                                      | 45 (38, 53) |
| 85°         | 59 (49, 69)                                                | 53 (44, 63) | 56 (47, 66)                                      | 49 (39, 58) |
| 90°         | 63 (52, 74)                                                | 58 (47, 68) | 60 (49, 71)                                      | 52 (41, 63) |
| 95°         | 67 (55, 78)                                                | 62 (50, 74) | 64 (52, 76)                                      | 55 (43, 67) |
| 100°        | 70 (58, 82)                                                | 66 (53, 79) | 67 (55, 80)                                      | 58 (44, 72) |
| 105°        | 74 (61, 86)                                                | 70 (56, 84) | 71 (58, 84)                                      | 61 (46, 77) |
| 110°        | 77 (64, 89)                                                | 73 (59, 88) | 74 (60, 87)                                      | 64 (48, 81) |

Adjusted for age, sex, body mass index, KL grade and symptoms  
AP, anteroposterior

**Supplementary table 7.** Association between alpha angle and cartilage defects (severity) for all hips (hip and/or groin pain and control)

| Radiographic variable       | No. of hips | Cartilage score                           |                                          |
|-----------------------------|-------------|-------------------------------------------|------------------------------------------|
|                             |             | Unadjusted IRR (95%CI)<br><i>P</i> -value | Adjusted IRR (95%CI)*<br><i>P</i> -value |
| Alpha angle (AP view)       | 398         | 1.01 (1.01, 1.02)<br>0.001                | 1.01 (1.00, 1.02)<br>0.017               |
| Alpha angle (Dunn 45° view) | 382         | 1.01 (1.00, 1.02)<br>0.074                | 1.00 (0.99, 1.01)<br>0.476               |

\*Adjusted for age, sex, body mass index, KL grade and symptoms  
AP, anteroposterior; IRR, incidence-rate ratio

**Supplementary table 8.** Association between alpha angle and labral tears (severity) for all hips (hip and/or groin pain and control)

| Radiographic variable       | No. of hips | Labral score                              |                                          |
|-----------------------------|-------------|-------------------------------------------|------------------------------------------|
|                             |             | Unadjusted IRR (95%CI)<br><i>P</i> -value | Adjusted IRR (95%CI)*<br><i>P</i> -value |
| Alpha angle (AP view)       | 398         | 1.01 (1.01, 1.02)<br><0.001               | 1.01 (1.00, 1.01)<br><0.001              |
| Alpha angle (Dunn 45° view) | 382         | 1.01 (1.00, 1.01)<br>0.013                | 1.01 (1.00, 1.01)<br>0.021               |

\*Adjusted for age, sex, body mass index, KL grade and symptoms  
AP, anteroposterior; IRR, incidence-rate ratio

**Supplementary figure 3.** Predicted cartilage defect and labral tear (severity) for 5° increase in alpha angle for all hips (hip and/or groin pain and control)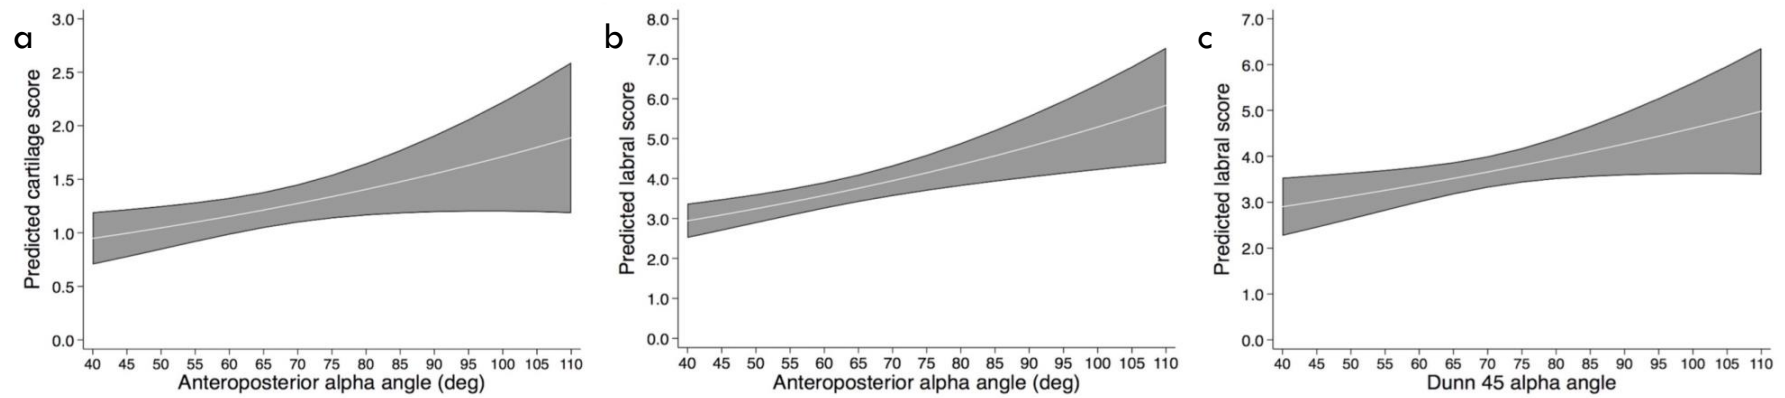

a) cartilage score (anteroposterior alpha angle); b) labral score (anteroposterior alpha angle); c) labral score (Dunn 45° alpha angle)

**Supplementary table 9.** Predicted cartilage defect and labral tear (severity) for values of alpha angle in 5° increments for all hips (hip and/or groin pain and control)

| Alpha angle<br>(AP) | Predicted cartilage score<br>(95%CI) |  | Predicted labral score<br>(95%CI) |                   |
|---------------------|--------------------------------------|--|-----------------------------------|-------------------|
|                     | AP                                   |  | AP                                | Dunn 45°          |
| 40°                 | 0.95 (0.70, 1.19)                    |  | 2.94 (2.52, 3.37)                 | 2.90 (2.27, 3.53) |
| 45°                 | 1.00 (0.77, 1.22)                    |  | 3.09 (2.70, 3.48)                 | 3.02 (2.45, 3.58) |
| 50°                 | 1.05 (0.84, 1.25)                    |  | 3.24 (2.89, 3.60)                 | 3.13 (2.63, 3.64) |
| 55°                 | 1.10 (0.92, 1.28)                    |  | 3.41 (3.07, 3.74)                 | 3.26 (2.82, 3.70) |
| 60°                 | 1.15 (0.98, 1.33)                    |  | 3.58 (3.25, 3.90)                 | 3.39 (3.00, 3.77) |
| 65°                 | 1.21 (1.05, 1.38)                    |  | 3.76 (3.42, 4.10)                 | 3.52 (3.17, 3.87) |
| 70°                 | 1.27 (1.10, 1.45)                    |  | 3.94 (3.57, 4.32)                 | 3.66 (3.32, 4.00) |
| 75°                 | 1.34 (1.14, 1.54)                    |  | 4.14 (3.70, 4.59)                 | 3.80 (3.43, 4.17) |
| 80°                 | 1.41 (1.16, 1.65)                    |  | 4.35 (3.82, 4.88)                 | 3.95 (3.51, 4.40) |
| 85°                 | 1.48 (1.18, 1.77)                    |  | 4.57 (3.93, 5.21)                 | 4.11 (3.56, 4.66) |
| 90°                 | 1.55 (1.19, 1.91)                    |  | 4.80 (4.03, 5.56)                 | 4.27 (3.59, 4.95) |
| 95°                 | 1.63 (1.20, 2.06)                    |  | 5.04 (4.12, 5.95)                 | 4.44 (3.61, 5.27) |
| 100°                | 1.71 (1.20, 2.22)                    |  | 5.29 (4.22, 6.36)                 | 4.61 (3.62, 5.61) |
| 105°                | 1.80 (1.19, 2.40)                    |  | 5.55 (4.30, 6.80)                 | 4.79 (3.61, 5.97) |
| 110°                | 1.89 (1.18, 2.59)                    |  | 5.83 (4.39, 7.28)                 | 4.98 (3.60, 6.36) |

Adjusted for age, sex, body mass index, KL grade and symptoms  
AP, anteroposterior

**Supplementary table 10.** Interaction between alpha angle and symptoms for cartilage defects (presence)

| Radiographic variable       | No. of hips | Cartilage defect     | Interaction term§ |
|-----------------------------|-------------|----------------------|-------------------|
|                             |             | Adjusted OR (95%CI)* | P-value           |
| Alpha angle (AP view)       |             |                      |                   |
| Control                     | 110         | 1.02 (1.00, 1.05)    | 0.756             |
| Hip and/or groin pain       | 288         | 1.03 (1.01, 1.04)    |                   |
| Alpha angle (Dunn 45° view) |             |                      |                   |
| Control                     | 108         | 1.03 (0.99, 1.06)    | 0.659             |
| Hip and/or groin pain       | 274         | 1.02 (1.00, 1.04)    |                   |

\* Adjusted for age, sex, body mass index and KL grade  
§ Alpha angle by presence of symptoms (hip and/or groin pain and positive FADIR test)  
AP, anteroposterior; OR, odds ratio

**Supplementary table 11.** Interaction between alpha angle and symptoms for labral tears (presence)

| Radiographic variable       | No. of hips | Labral tear          | Interaction term§ |
|-----------------------------|-------------|----------------------|-------------------|
|                             |             | Adjusted OR (95%CI)* | P-value           |
| Alpha angle (AP view)       |             |                      |                   |
| Control                     | 110         | 1.03 (1.00, 1.05)    | 0.662             |
| Hip and/or groin pain       | 288         | 1.02 (1.00, 1.04)    |                   |
| Alpha angle (Dunn 45° view) |             |                      |                   |
| Control                     | 108         | 1.01 (0.98, 1.05)    | 0.477             |
| Hip and/or groin pain       | 274         | 1.03 (1.00, 1.05)    |                   |

\* Adjusted for age, sex, body mass index and KL grade  
§ Alpha angle by presence of symptoms (hip and/or groin pain and positive FADIR test)  
AP, anteroposterior; OR, odds ratio

**Supplementary table 12.** Interaction between alpha angle and symptoms for cartilage defects (location)

| Radiographic variable          | No. of hips | Cartilage defect     | Interaction term§ |
|--------------------------------|-------------|----------------------|-------------------|
|                                |             | Adjusted OR (95%CI)* | P-value           |
| <b>Superolateral subregion</b> |             |                      |                   |
| Alpha angle (AP view)          |             |                      |                   |
| Control                        | 110         | 1.03 (1.01, 1.06)    | 0.749             |
| Hip and/or groin pain          | 288         | 1.03 (1.02, 1.05)    |                   |
| Alpha angle (Dunn 45° view)    |             |                      |                   |
| Control                        | 108         | 1.04 (1.00, 1.08)    | 0.822             |
| Hip and/or groin pain          | 274         | 1.03 (1.01, 1.06)    |                   |
| <b>Superomedial subregion</b>  |             |                      |                   |
| Alpha angle (AP view)          |             |                      |                   |
| Control                        | 110         | 0.96 (0.89, 1.03)    | 0.213             |
| Hip and/or groin pain          | 288         | 1.01 (0.98, 1.03)    |                   |
| Alpha angle (Dunn 45° view)    |             |                      |                   |
| Control                        | 108         | 0.99 (0.92, 1.07)    | 0.833             |
| Hip and/or groin pain          | 274         | 0.98 (0.96, 1.01)    |                   |
| <b>Lateral subregion</b>       |             |                      |                   |
| Alpha angle (AP view)          |             |                      |                   |
| Control                        | 110         | 1.00 (0.97, 1.02)    | 0.451             |
| Hip and/or groin pain          | 288         | 1.01 (0.99, 1.03)    |                   |
| Alpha angle (Dunn 45° view)    |             |                      |                   |
| Control                        | 108         | 1.00 (0.97, 1.04)    | 0.642             |
| Hip and/or groin pain          | 274         | 0.99 (0.98, 1.01)    |                   |

\* Adjusted for age, sex, body mass index and KL grade  
§ Alpha angle by presence of symptoms (hip and/or groin pain and positive FADIR test)  
AP, anteroposterior; OR, odds ratio

**Supplementary table 13.** Interaction between alpha angle and symptoms for labral tears (location)

| Radiographic variable           | No. of hips | Labral tear          | Interaction term§ |
|---------------------------------|-------------|----------------------|-------------------|
|                                 |             | Adjusted OR (95%CI)* | P-value           |
| <b>Superior subregion</b>       |             |                      |                   |
| Alpha angle (AP view)           |             |                      |                   |
| Control                         | 110         | 1.04 (1.01, 1.07)    | 0.484             |
| Hip and/or groin pain           | 288         | 1.03 (1.01, 1.04)    |                   |
| Alpha angle (Dunn 45° view)     |             |                      |                   |
| Control                         | 108         | 1.03 (0.99, 1.06)    | 0.937             |
| Hip and/or groin pain           | 274         | 1.03 (1.01, 1.05)    |                   |
| <b>Anterosuperior subregion</b> |             |                      |                   |
| Alpha angle (AP view)           |             |                      |                   |
| Control                         | 110         | 1.02 (1.00, 1.04)    | 0.189             |
| Hip and/or groin pain           | 288         | 1.00 (0.99, 1.02)    |                   |
| Alpha angle (Dunn 45° view)     |             |                      |                   |
| Control                         | 108         | 1.02 (0.99, 1.05)    | 0.616             |
| Hip and/or groin pain           | 274         | 1.01 (0.99, 1.03)    |                   |

\* Adjusted for age, sex, body mass index and KL grade  
§ Alpha angle by presence of symptoms (hip and/or groin pain and positive FADIR test)  
AP, anteroposterior; OR, odds ratio

**Supplementary table 14.** Interaction between alpha angle and symptoms for cartilage defects (score)

| Radiographic variable       | No. of hips | Cartilage score       | Interaction term§ |
|-----------------------------|-------------|-----------------------|-------------------|
|                             |             | Adjusted IRR (95%CI)* | P-value           |
| Alpha angle (AP view)       |             |                       |                   |
| Control                     | 110         | 1.00 (0.99, 1.02)     | 0.393             |
| Hip and/or groin pain       | 288         | 1.01 (1.00, 1.02)     |                   |
| Alpha angle (Dunn 45° view) |             |                       |                   |
| Control                     | 108         | 1.01 (0.99, 1.03)     | 0.859             |
| Hip and/or groin pain       | 274         | 1.00 (0.99, 1.01)     |                   |

\* Adjusted for age, sex, body mass index and KL grade  
§ Alpha angle by presence of symptoms (hip and/or groin pain and positive FADIR test)  
AP, anteroposterior; IRR, incidence-rate ratio

**Supplementary table 15.** Interaction between alpha angle and symptoms for labral tears (score)

| Interaction between alpha angle and symptoms for labral tears (score) |             |                       |                   |
|-----------------------------------------------------------------------|-------------|-----------------------|-------------------|
| Radiographic variable                                                 | No. of hips | Labral score          | Interaction term§ |
|                                                                       |             | Adjusted IRR (95%CI)* | P-value           |
| Alpha angle (AP view)                                                 |             |                       |                   |
| Control                                                               | 110         | 1.01 (1.00, 1.02)     | 0.590             |
| Hip and/or groin pain                                                 | 288         | 1.01 (1.00, 1.01)     |                   |
| Alpha angle (Dunn 45° view)                                           |             |                       |                   |
| Control                                                               | 108         | 1.01 (0.99, 1.02)     | 0.889             |
| Hip and/or groin pain                                                 | 274         | 1.01 (1.00, 1.01)     |                   |

\* Adjusted for age, sex, body mass index and KL grade  
§ Alpha angle by presence of symptoms (hip and/or groin pain and positive FADIR test)  
AP, anteroposterior; IRR, incidence-rate ratio
